# INFOGRAPHICS IN ANESTHESIOLOGY

Complex Information for Anesthesiologists Presented Quickly and Clearly

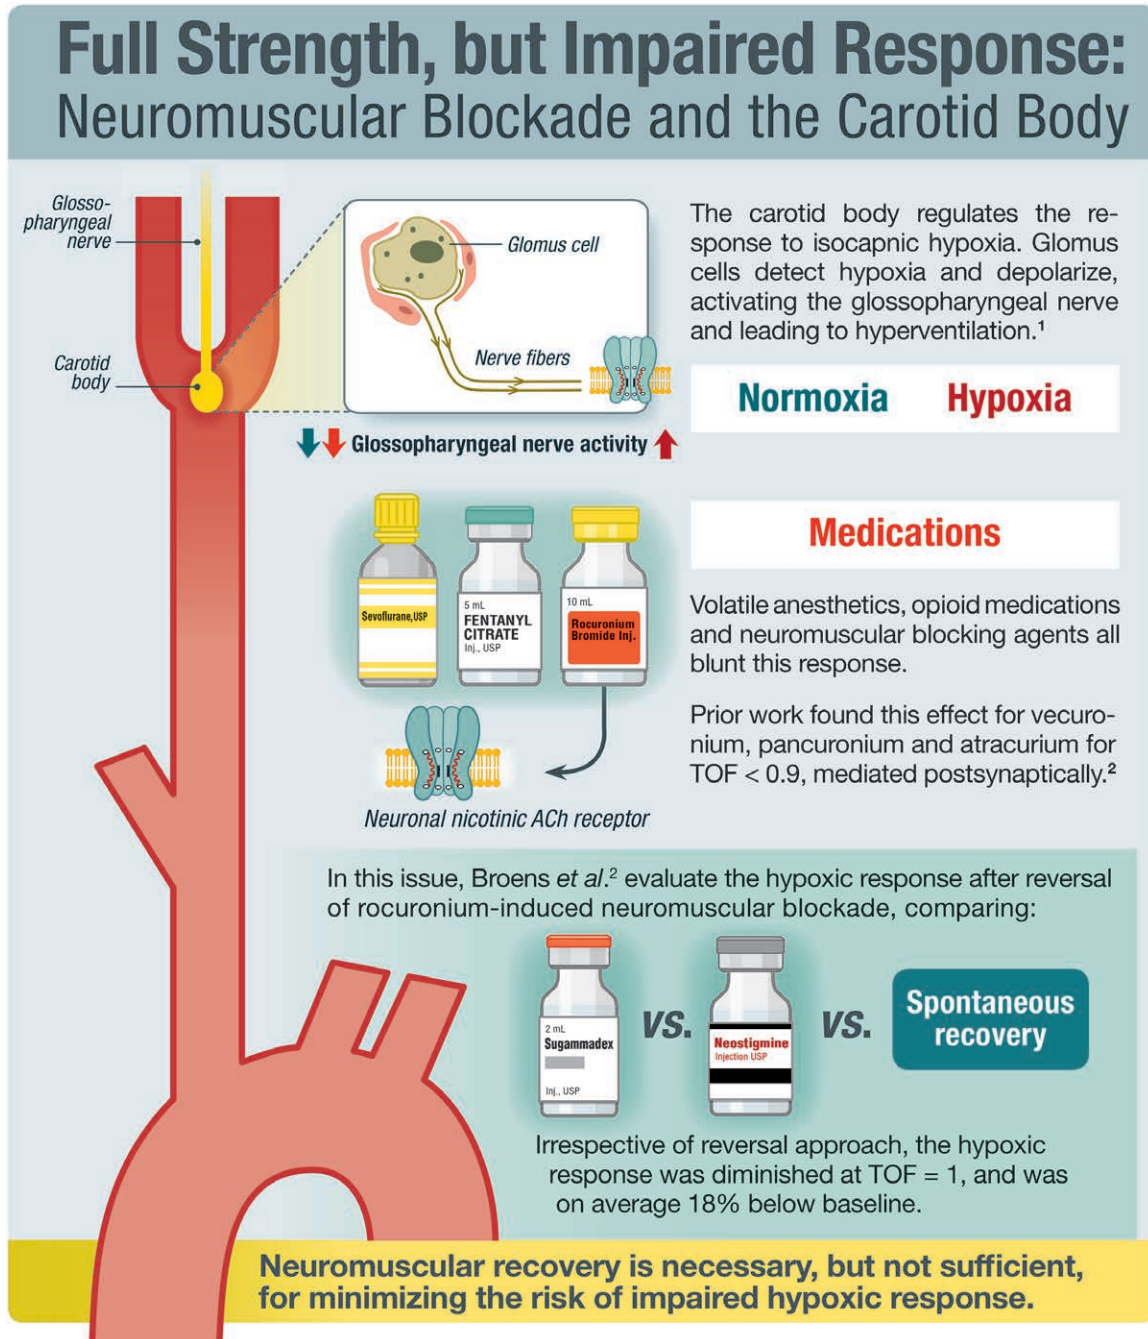

ACh, acetylcholine; TOF, train of four.

Infographic created by Jonathan P. Wanderer, Vanderbilt University Medical Center, and James P. Rathmell, Brigham and Women's Health Care/Harvard Medical School.

Illustration by Annemarie Johnson, Vivo Visuals. Address correspondence to Dr. Wanderer: jonathan.p.wanderer@vanderbilt.edu. This Infographic has a related article on p. 467.

1. López-Barneo J, Ortega-Sáenz P, Pardo R, Pascual A, Piruat JL. Carotid body oxygen sensing. *Eur Respir J* 2008; 32:1386–98

2. Broens SJL, Boon M, Martini CH, Niesters M, van Velzen M, Aarts LPHJ, Dahan A: Reversal of partial neuromuscular block and the ventilatory response to hypoxia: A randomized controlled trial in healthy volunteers. *ANESTHESIOLOGY* 2019; 131:467–76
